# Supplementary material for: Recyclable and efficient heterogenized Rh and Ir catalysts for the transfer hydrogenation of carbonyl compounds in aqueous medium
Source: Royal Society of Chemistry journal article supplement (doi:10.1039/c6gc02195f), 2016-01-01
Supplement: c6gc02195f1.pdf [file c6gc02195f1.pdf]

### Supplementary Information for

### Recyclable and efficient heterogenized Rh and Ir catalysts for the transfer hydrogenation of carbonyl compounds in aqueous medium

P. Sudakar,<sup>a</sup> G. H. Gunasekar,<sup>a</sup> I. Baek,<sup>\*b</sup> and S. Yoon<sup>\*a</sup>

<sup>a</sup>*Department of Bio & Nano Chemistry, Kookmin University, 861-1, Jeongneung-dong, Seongbuk-gu, Seoul, 136-702, Republic of Korea.*

<sup>b</sup>*Korea Institute of Energy Research, 152 Gajeong-ro, Yuseong-gu, Daejeon 305-343, Republic of Korea*  
*E-mail: yoona@kookmin.ac.kr*

#### General Considerations:

All reagents and materials used in this study were obtained from commercial sources and used as received unless mentioned otherwise. The catalyst 1, 2 and the metal precursors [IrCp\*Cl<sub>2</sub>]<sub>2</sub> and [RhCp\*Cl<sub>2</sub>]<sub>2</sub> were synthesized by following a published procedure.<sup>1,2</sup> Bpy-CTF was synthesized according to a reported procedure.<sup>3</sup> FT-IR spectra were recorded on a Nicolet iS 50 instrument from Thermo Fischer Scientific. A JEOL LTD (JAPAN) JEM-7610F operated at an accelerating voltage of 20.0 kV was used for the Scanning Electron Microscopy (SEM) and Energy-Dispersive X-ray Spectroscopy (EDS) measurements. X-ray photoelectron Spectroscopy (XPS) analysis was performed on an ESCA 2000 (VG microtech) at a pressure of  $\sim 3 \times 10^{-9}$  mbar using Al K $\alpha$  as the excitation source ( $h\nu=1486.6$  eV) with concentric hemispherical analyzer. Metal contents in complex 3 and 4 were determined by ICP-MS (iCAP-Q, Thermo fisher scientific) using microwave assisted acid digestion system (MARS6, CEM/U.S.A). BET surface area and N<sub>2</sub> adsorption-desorption measurements were conducted at 77 K using an automated gas sorption system (Belsorp II mini, BEL Japan, Inc.,). The conversions of the ketones into alcohols were determined by <sup>1</sup>H-NMR spectroscopy using an ASCEND 400MHZ (BRUKER) instrument. pH of the solutions were measured using a Metrohm 780 pH meter with a glass electrode probe. pH values were adjusted using 1M solutions of HCOOH and HCOONa. pD values were adjusted using DCOOD and DCOONa in D<sub>2</sub>O and the pH meter readings were converted to pD values by adding a conversion factor of 0.4 (pD = pH + 0.4).

#### General Procedure for the transfer hydrogenation of carbonyl compounds:

The [bpy-CTF-(MCp\*Cl)]Cl catalyst (1 equivalent) was taken in a 25 mL double neck round bottom flask. To this 200 equivalents of ketone were added followed by 2.50 mL of degassed aq. HCOOH/HCOONa mixture (pH =3.504). The reaction was performed at 40 °C for allowed reaction times and then the reaction mass was filtered through a filter paper and the catalyst was washed well with water and then dried at 100 °C for 8 h. The dried catalyst was directly used in the recycling experiments.

### Synthesis of catalysts 3 and 4:

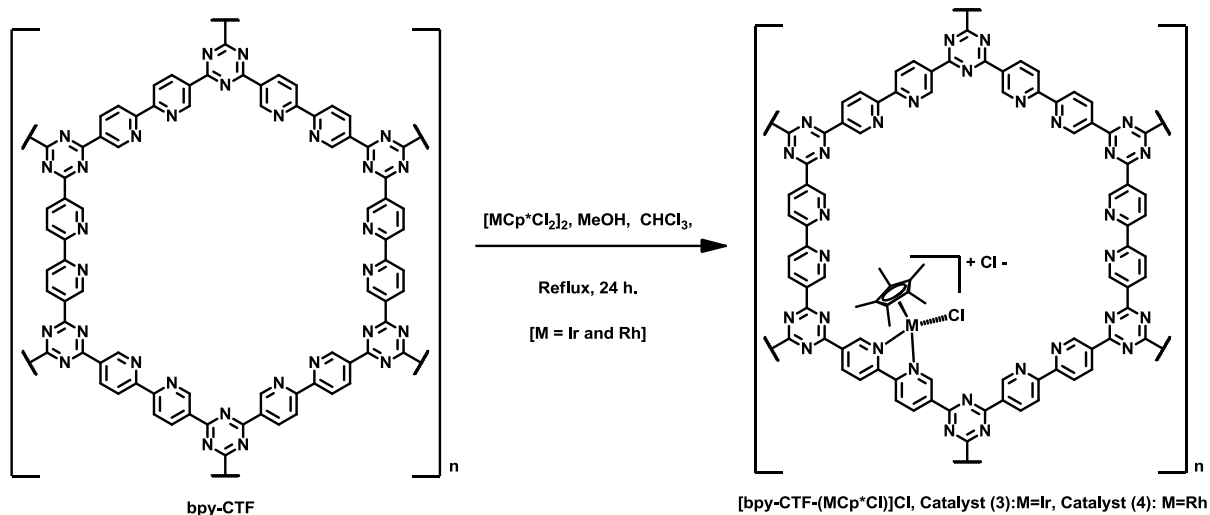

### Scheme S1. Synthesis of catalyst 3 and 4.

To a suspension of bpy-CTF (0.2 g) in 1:1 mixture of methanol and chloroform (15.0 mL) was added metal dimer (10 wt%) under N<sub>2</sub> atm. The resulting suspension was refluxed under N<sub>2</sub> atm for 24 h. After 24 h, the black solid was filtered and washed with excess of dichloromethane (10 X 25 mL) to remove the unreacted metal precursor. The as-synthesized catalyst was dried under vacuum for 16 h.

### FT-IR of bpy-CTF, Catalyst 3 and 4:

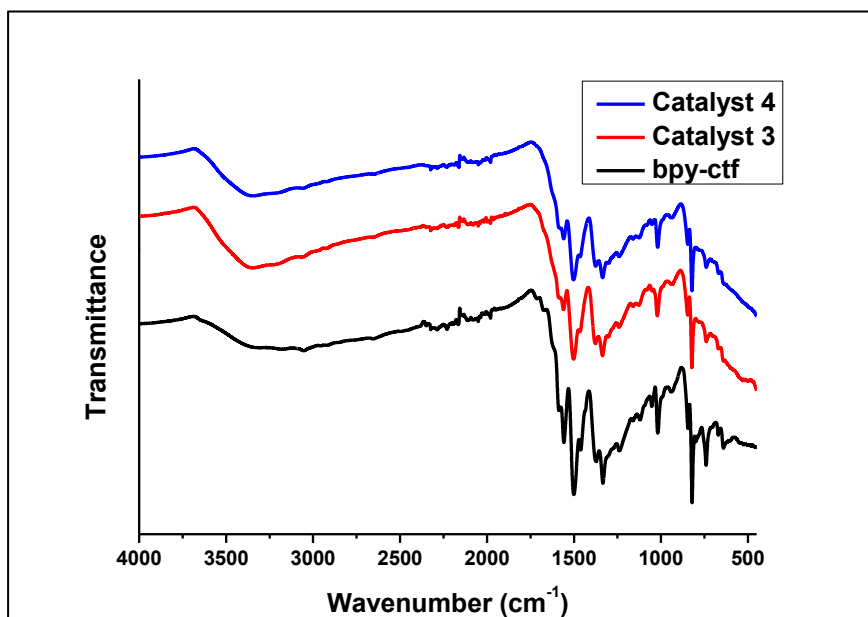

Fig. S1. The FT-IR spectra of bpy-CTF, catalyst 3 and 4.

Scanning Electron Microscopic (SEM) Images.

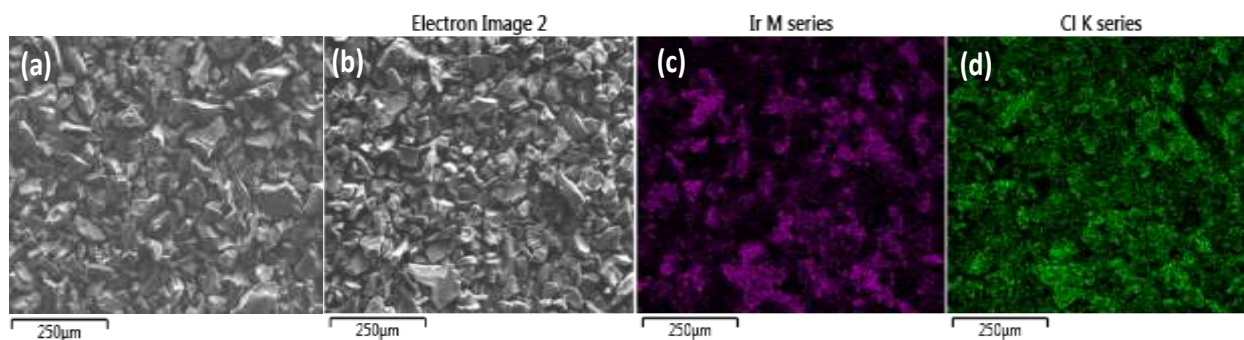

Fig. S2. SEM image of (a) bpy-CTF, (b) catalyst 3; EDS mapping of (c) Iridium and (d) Chlorine in catalyst 3.

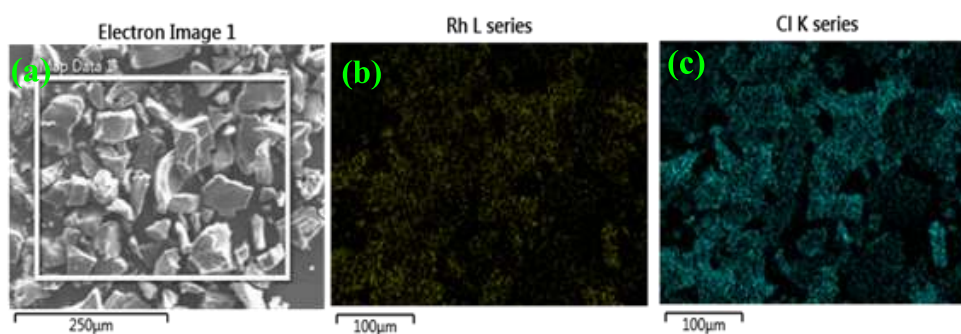

Fig. S3. SEM image of (a) catalyst 4; EDS mapping of (b) Rhodium and (c) Chlorine in catalyst 4.

Table S1. BET analysis of bpy-CTF, Complex 3, Complex 4 and ICP-MS data:

| Material   | $S_{\text{BET}}$ ( $\text{m}^2/\text{g}$ ) | Pore volume ( $\text{cm}^3/\text{g}$ ) | Ir content by ICP-MS (Wt%) |
|------------|--------------------------------------------|----------------------------------------|----------------------------|
| bpy-CTF    | 684.6                                      | 0.400                                  | --                         |
| Catalyst 3 | 170.24                                     | 0.095                                  | 4.70                       |
| Catalyst 4 | 151.8                                      | 0.126                                  | 1.72                       |

Table S2. Pore volume of bpy-CTF with various metal contents:

| Compound/ Ir content (Wt%) | Surface area ( $\text{m}^2/\text{g}$ ) | Total pore volume ( $\text{cm}^3/\text{g}$ ) |
|----------------------------|----------------------------------------|----------------------------------------------|
| bpy-CTF400                 | 684.59                                 | 0.400                                        |
| Ir/1.4                     | 479.98                                 | 0.280                                        |
| Ir/4.7                     | 170.24                                 | 0.095                                        |
| Ir/10.6                    | 9.74                                   | 0.010                                        |

**Table S3.** TH of carbonyl compounds using catalysts **3** and **4**.<sup>a</sup>

| Entry | Substrate                                 |    | S/C | Catalyst 3 |                             |                  |                                     |                        | Catalyst 4 |                             |                  |                                     |                        |
|-------|-------------------------------------------|----|-----|------------|-----------------------------|------------------|-------------------------------------|------------------------|------------|-----------------------------|------------------|-------------------------------------|------------------------|
|       | R                                         | R' |     | Time (h)   | Conversion <sup>b</sup> (%) | TON <sup>c</sup> | TOF <sup>d</sup> (h <sup>-1</sup> ) | Yield <sup>e</sup> (%) | Time (h)   | Conversion <sup>b</sup> (%) | TON <sup>c</sup> | TOF <sup>d</sup> (h <sup>-1</sup> ) | Yield <sup>e</sup> (%) |
| 1     | Ph                                        | Me | 100 | 24         | 99.0                        | 99               | 4.1                                 | 76.1                   | 8          | 99.0                        | 99               | 12.4                                | 72.1                   |
| 2     | Ph                                        | Me | 200 | 30         | 99.0                        | 198              | 6.6                                 | 78.4                   | 12         | 99.0                        | 198              | 16.5                                | 77.6                   |
| 3     | p-OMe- Ph                                 | Me | 200 | 30         | 59.2                        | 118              | 3.9                                 | 41.1                   | 24         | 98.3                        | 197              | 8.1                                 | 92.1                   |
| 4     | p-Me- Ph                                  | Me | 200 | 30         | 52.6                        | 105              | 3.5                                 | 40.7                   | 24         | 94.3                        | 189              | 7.8                                 | 75.8                   |
| 5     | p-Cl-Ph                                   | Me | 200 | 24         | 99.0                        | 198              | 8.3                                 | 85.4                   | 10         | 99.0                        | 198              | 19.8                                | 84.3                   |
| 6     | Me                                        | Me | 200 | 30         | 30.1                        | 60               | 2.0                                 | 10.4                   | 12         | 56.4                        | 113              | 9.3                                 | 18.1                   |
| 7     | R,R' = -(CH <sub>2</sub> ) <sub>5</sub> - |    | 200 | 30         | 96.4                        | 193              | 6.4                                 | 64.1                   | 12         | 96.8                        | 194              | 16.2                                | 79.2                   |
| 8     | Ph                                        | H  | 200 | 12         | 86.0                        | 172              | 14.3                                | 65.2                   | 12         | 95.4                        | 191              | 15.8                                | 73.5                   |

<sup>a</sup>Reaction Conditions: 40 °C, pH = 3.5, HCOOH/HCOONa = 2.5 mL. <sup>b</sup>Determined by <sup>1</sup>H-NMR. <sup>c</sup>Based on <sup>1</sup>H-NMR conversion; No. of moles of product/No. of moles of metal. <sup>d</sup>TON/h. <sup>e</sup>isolated crude yield.

<sup>1</sup>H-NMR spectra:

Reaction of acetophenone with DCOOD/DCOONa in D<sub>2</sub>O

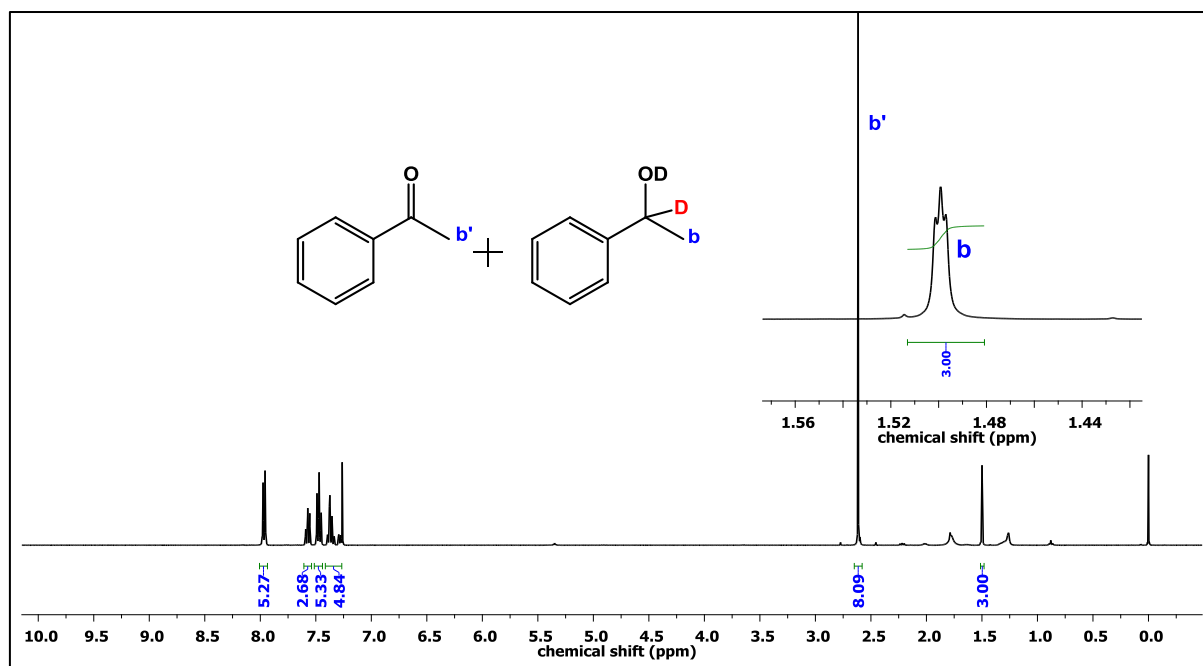

Fig. S4. <sup>1</sup>H-NMR spectrum of crude product (in D<sub>2</sub>O) resulted in the reaction of acetophenone with DCOOD/DCOONa using catalyst **4** in D<sub>2</sub>O

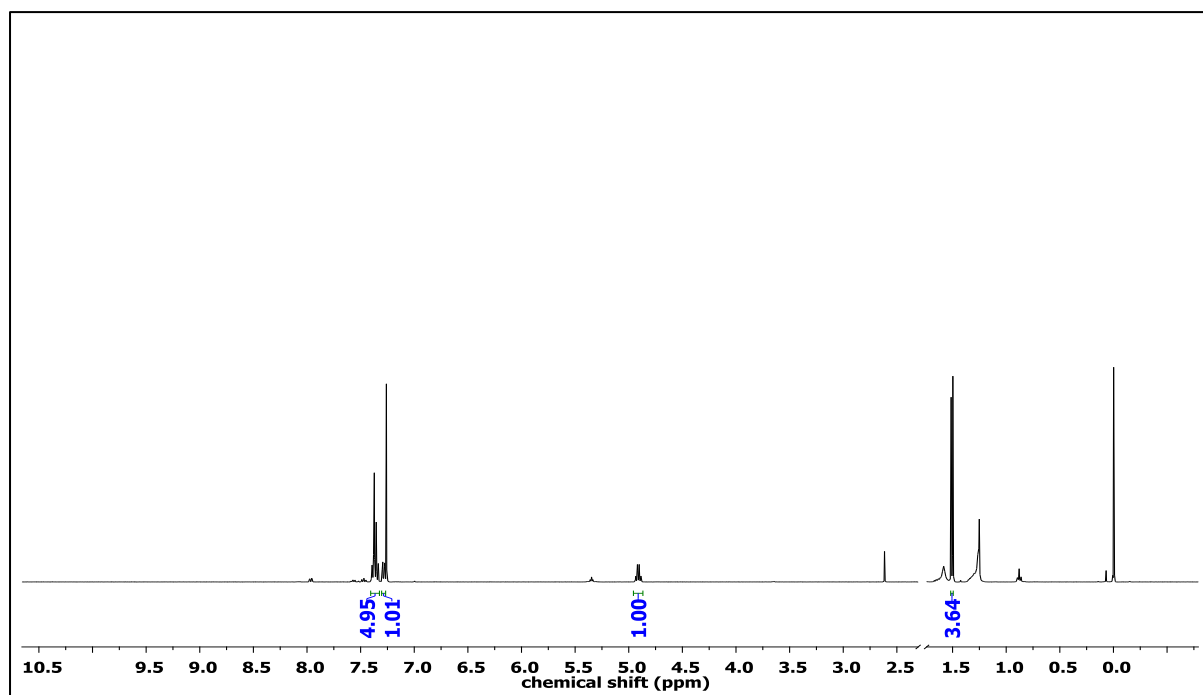

Fig. S5. <sup>1</sup>H-NMR spectrum of crude product (in D<sub>2</sub>O) resulted in the reaction of acetophenone with HCOOH/HCOONa using catalyst **4** in D<sub>2</sub>O as a reaction medium.

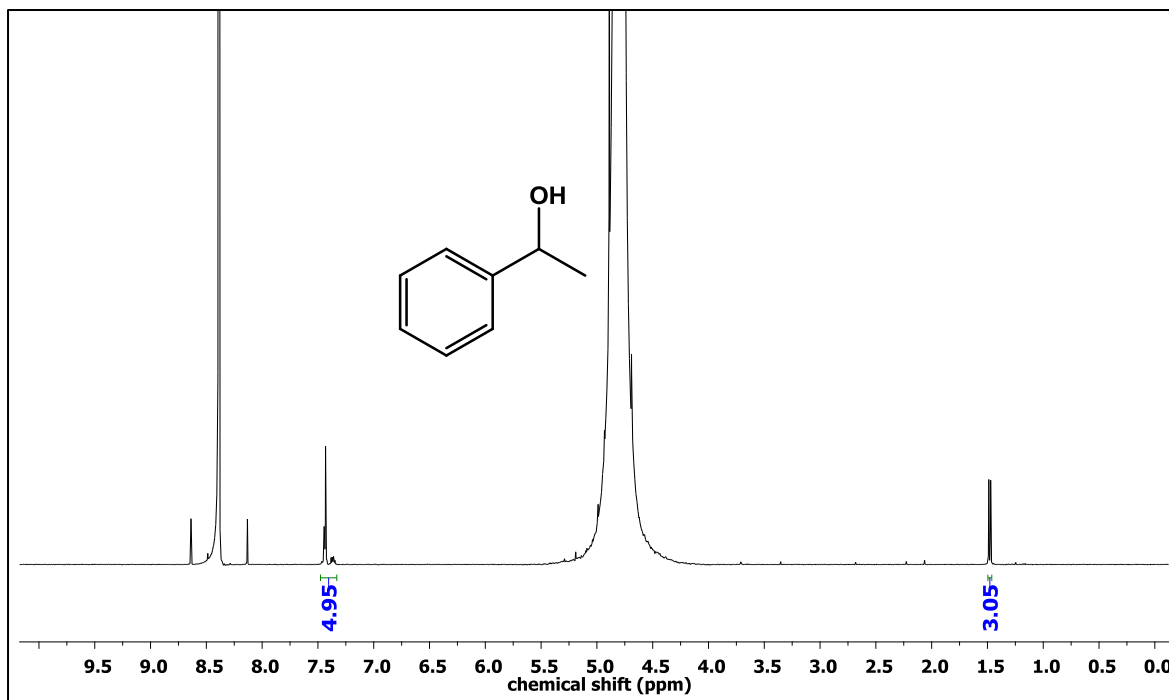

Fig. S6. <sup>1</sup>H-NMR spectrum of reaction mass that shows the formation of 1-phenyl ethanol in D<sub>2</sub>O.

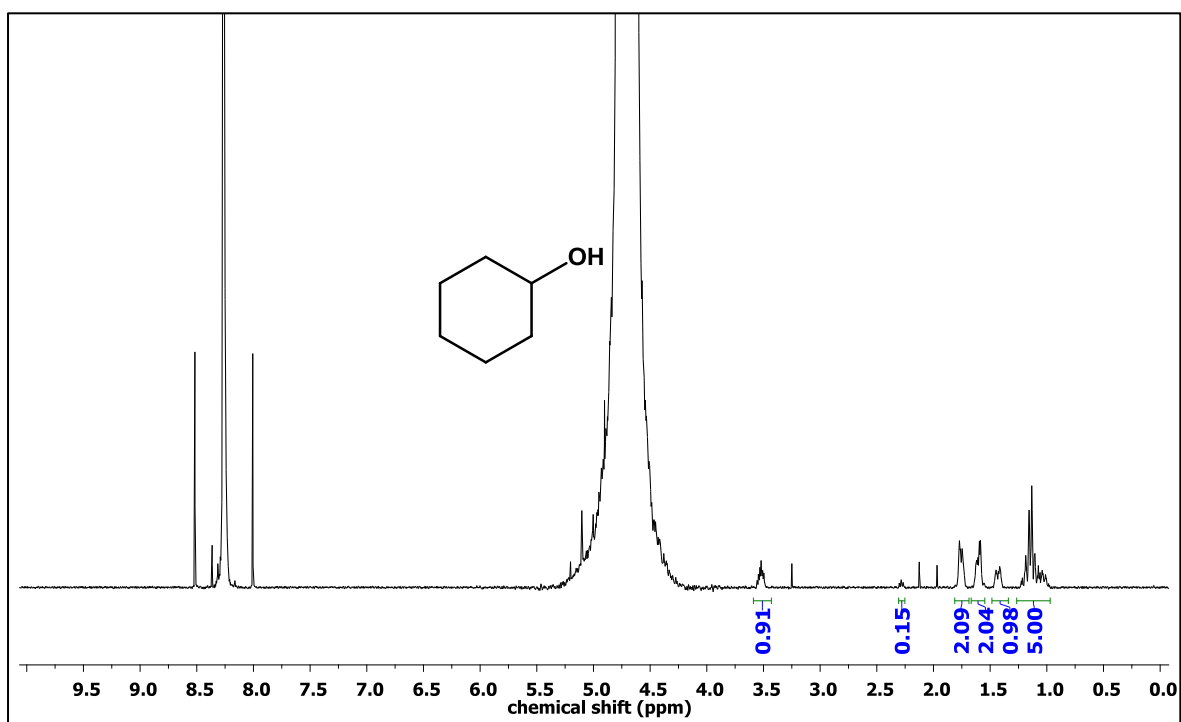

Fig. S7. <sup>1</sup>H-NMR spectrum of reaction mass that shows the formation of cyclohexylalcohol in D<sub>2</sub>O:

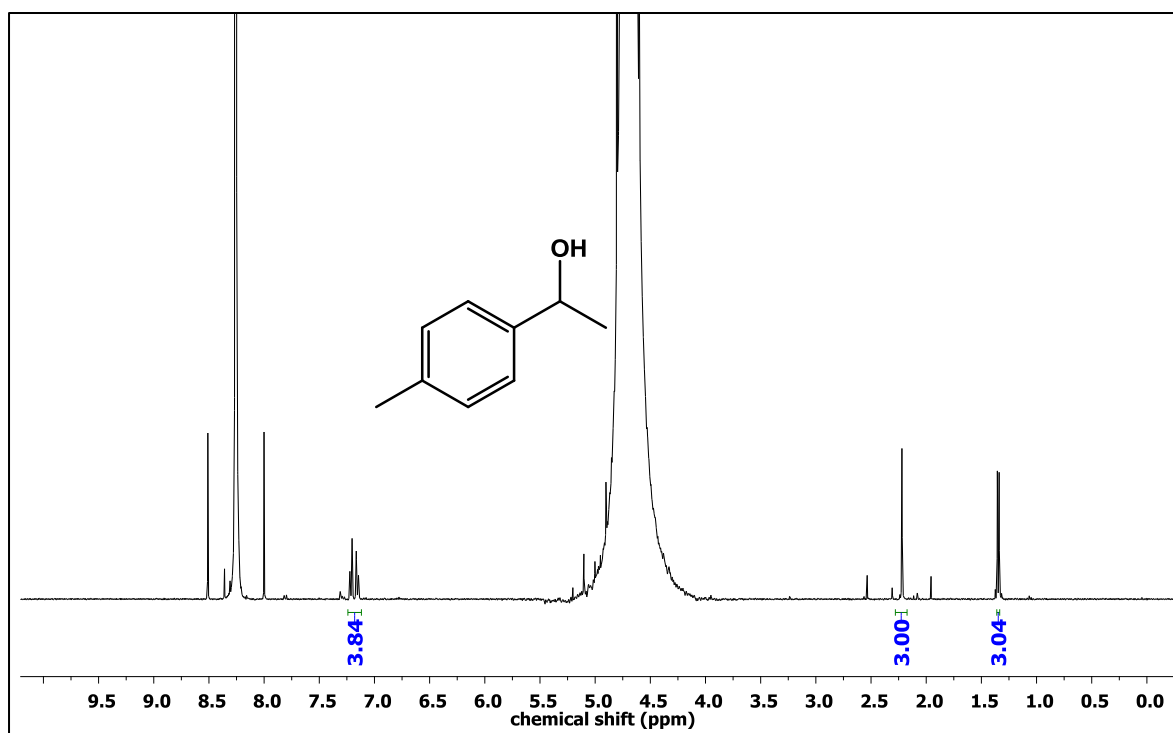

Fig. S8. <sup>1</sup>H-NMR spectrum of reaction mass that shows the formation of 1-(4'-methylphenyl)-ethanol in D<sub>2</sub>O.

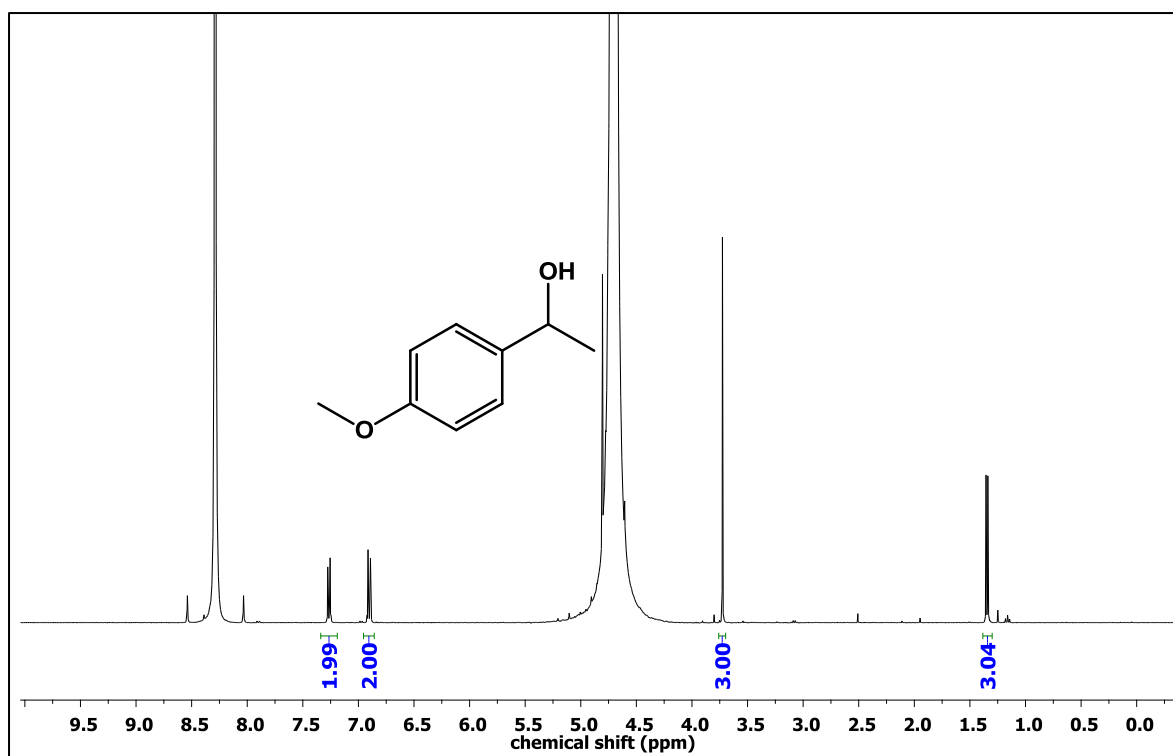

Fig. S9. <sup>1</sup>H-NMR spectrum of reaction mass that shows the formation of 1-(4'-methoxyphenyl)-ethanol in D<sub>2</sub>O.

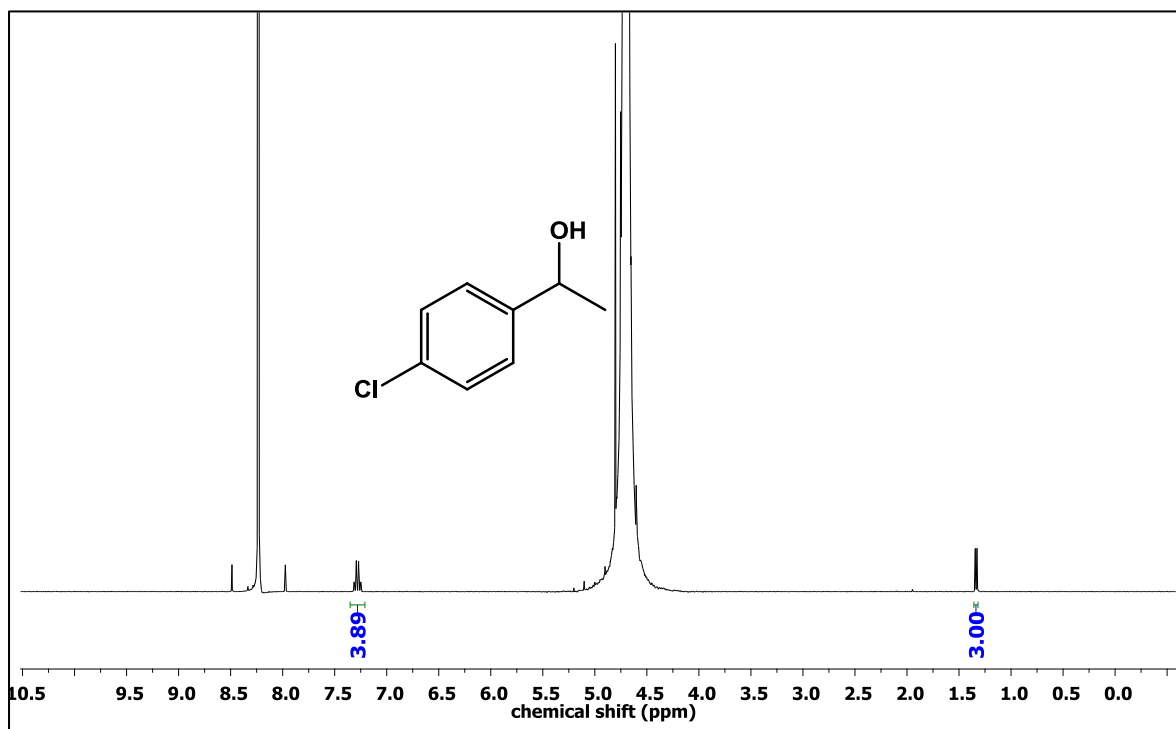

Fig. S10. <sup>1</sup>H-NMR spectrum of reaction mass that shows the formation of 1-(4'-chlorolphenyl)-ethanol in D<sub>2</sub>O.

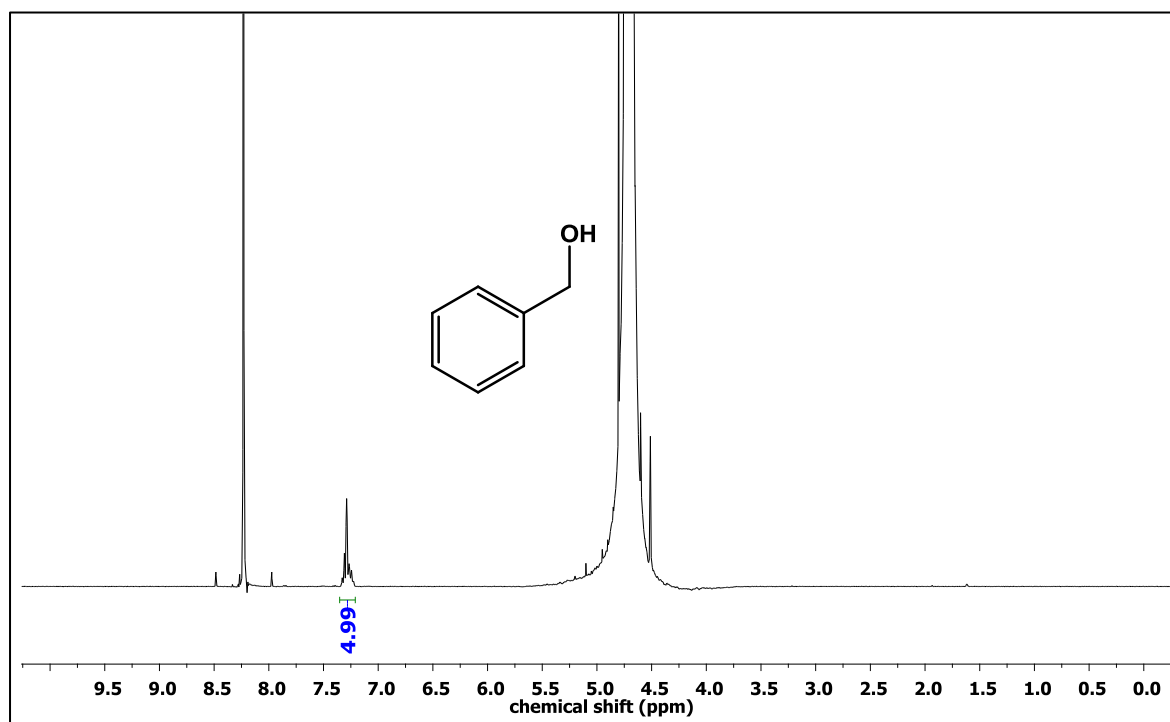

Fig. S11. <sup>1</sup>H-NMR spectrum of reaction mass that shows the formation of benzyl alcohol in D<sub>2</sub>O



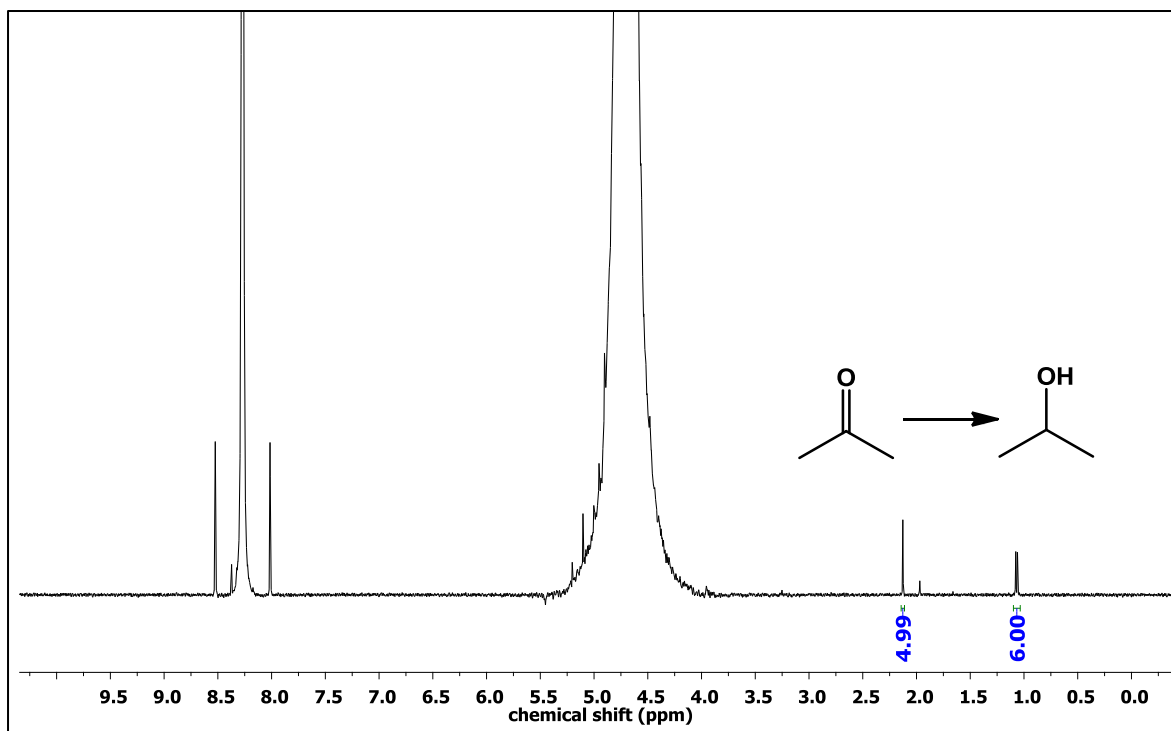

**Fig. S12.** <sup>1</sup>H-NMR spectrum of reaction mass that shows the formation of isopropyl alcohol (55 % conversion) in D<sub>2</sub>O.

1. Y. Himeda, N. Onozawa-Komatsuzaki, H. Sugihara, H. Arakawa and K. Kasuga, *J Mol Catal A-Chem*, 2003, **195**, 95-100.
2. R. G. Ball, W. A. G. Graham, D. M. Heinekey, J. K. Hoyano, A. D. McMaster, B. M. Mattson, and S. T. Michel, *Inorg. Chem.* 1990, **29**, 2023-2025
3. K. Park, G. H. Gunasekar, N. Prakash, K. D. Jung and S. Yoon, *Chemsuschem*, 2015, **8**, 3410-3413.
